# Supplementary material for: Environmental profile of the production of fragrance ingredients used in cosmetic products: comparative analysis of results obtained by life cycle assessment and the green chemistry-based eco-design tool GREEN MOTION™
Source: Royal Society of Chemistry journal article supplement (doi:10.1039/d2gc04860d), 2023-01-01
Supplement: d2gc04860d1.pdf [file d2gc04860d1.pdf]

## Supporting Information

Environmental profile of the production of fragrance ingredients used in cosmetic products: comparative analysis of results obtained by Life Cycle Assessment and the Green Chemistry-based eco-design tool GREEN MOTION™

Patricia Martz<sup>\*a</sup>, Tony Phan<sup>b</sup>, Jacques L'Haridon<sup>a</sup>, Marie-Hélène Beausoleil<sup>a</sup>, Kévin Lafaye<sup>c</sup>, Yves Gérard<sup>c</sup> and Cyril Gallardo<sup>b</sup>

<sup>a</sup> L'Oreal Research and Innovation, 1 avenue Eugène Schueller, 93600, Aulnay-sous-Bois, France.

<sup>b</sup> MANE, 620 route de Grasse, 06620, Le Bar-sur-Loup, France.

<sup>c</sup> EVEA, 3 rue Michel Rambaud, 69006, Lyon, France.

**Table of contents**

|   |                                                                      |   |
|---|----------------------------------------------------------------------|---|
| 1 | Data sources for ingredients modelling .....                         | 3 |
| 2 | Production process: modelling of energy and water requirements ..... | 4 |
| 3 | Environmental results of fragrance ingredients.....                  | 5 |

## 1 Data sources for ingredients modelling

Sources of data to model raw material and production process for all the fragrance ingredients studied are summarized in Table 1.

Table 1: Description of data sources for fragrance ingredients modeling

| Category                                                  | Ingredients                             | Produced inhouse or bought | Starting raw material                    | Raw material data source           | Manufacturing process data (Mane production unit or supplier data) |
|-----------------------------------------------------------|-----------------------------------------|----------------------------|------------------------------------------|------------------------------------|--------------------------------------------------------------------|
| <b>Essentials oils (EO) and Jungle Essences™</b>          | Lavender EO                             | Bought                     | Flower                                   | Specific                           | Supplier data                                                      |
|                                                           | Elemi EO                                | Produced                   | Resin                                    | Adapted from WFLDB                 | MANE – Natural extracts                                            |
|                                                           | Iris EO                                 | Produced                   | Rhizome                                  | Bibliography                       |                                                                    |
|                                                           | Vetiver EO                              | Bought                     | Root                                     | Specific                           | MANE's supplier                                                    |
|                                                           | Pure vanilla Jungle Essence™            | Produced                   | Beans                                    | WFLDB                              | MANE – Natural extracts                                            |
|                                                           | Pure pink berry Jungle Essence™         | Produced                   | Pink berry                               | Specific                           |                                                                    |
| <b>Essences by expression</b>                             | Orange flower absolute                  | Bought                     | Fruit                                    | Ecoinvent                          | Supplier data                                                      |
| <b>Natural extracts with volatile solvent - Absolutes</b> | Orange absolute                         | Produced                   | Flower                                   | Specific                           | MANE – Natural extracts                                            |
|                                                           | Jasmine absolute                        | Produced                   |                                          |                                    |                                                                    |
|                                                           | Narcissus absolute                      | Produced                   |                                          |                                    |                                                                    |
|                                                           | Rose absolute                           | Produced                   |                                          |                                    |                                                                    |
| <b>Natural extracts with volatile solvent - Resinoids</b> | Benzoin resin                           | Produced                   | Resin                                    | Specific                           | MANE – Natural extracts                                            |
|                                                           | Labdanum resinoid                       | Produced                   | Leafy branches                           | Specific                           |                                                                    |
|                                                           | Labdanum absolute                       | Produced                   |                                          | Specific                           |                                                                    |
|                                                           | Vanilla absolute                        | Produced                   | Beans                                    | WFLDB                              |                                                                    |
| <b>Isolated natural ingredients</b>                       | cis-3-Hexenol (natural)                 | Bought                     | Mint leaves                              | Adapted from WFLDB                 | MANE – Fractionation                                               |
| <b>Bio-based ingredients with a fossil-based moiety</b>   | Iso E super                             | Bought                     | Myrcene <sup>e</sup>                     | Ecoinvent (CST)<br>Specific (pine) | Supplier data                                                      |
|                                                           | Vetiveryl acetate                       | Produced                   | Vetiver essence                          | Specific                           | MANE – Synthesis                                                   |
|                                                           | Myrcene (from crude sulfate turpentine) | Bought                     | Wood chips                               | Ecoinvent                          | MANE's supplier /<br>MANE – Fractionation                          |
|                                                           | Myrcene (from pine)                     | Bought                     | Pine resin                               | Specific                           |                                                                    |
| <b>Fossil-based ingredients</b>                           | Hexyl salicylate                        | Bought                     | Synthesized from petrochemical materials | Ecoinvent                          | Supplier data                                                      |
|                                                           | Ethyl 2-methyl butyrate                 | Produced                   |                                          |                                    | MANE – Synthesis                                                   |
|                                                           | Hedione                                 | Bought                     |                                          |                                    | Supplier data                                                      |
|                                                           | cis-3-Hexenol (fossil)                  | Bought                     |                                          |                                    |                                                                    |
| <b>Biotechnology ingredients</b>                          | Antillone                               | Produced                   | Natural ingredient                       | Specific                           | MANE – at plant level                                              |
|                                                           | gamma-Octalactone                       | Produced                   |                                          | Specific                           |                                                                    |
|                                                           | Tropicalone                             | Produced                   |                                          | Specific                           |                                                                    |

## 2 Production process: modelling of energy and water requirements

Each ingredient is associated to a specific production unit (see Table 1 above). Global energy and water requirements in MANE's plant are known for 3 types of production units: natural extracts, synthesis, and fractionation; and are estimated based on energy and water uses at the global plant level for the biotechnology production unit.

Energy and water requirements are linked to the process duration and to the process type. The latter is mainly defined by the heating type. Process type and process duration are specifically monitored by MANE for each ingredient. These two parameters have thus been used to estimate the specific energy and water requirements for each ingredient.

Based on Mane's knowledge of their processes, each type of process is ranked depending on its energy and water requirements per hour, and an "Energy and water equivalence coefficient (EC)" has been estimated to compare each process to a reference (Expanded steam process). Values are summarized in Table 2.

Table 2: Equivalence coefficients to estimate the needs of a specific process

| Type of process                  | Energy and water equivalence coefficient (EC) |
|----------------------------------|-----------------------------------------------|
| Expanded steam (reference)       | 1                                             |
| Steam with a pressure of 3 bars  | 2                                             |
| Steam with a pressure of 6 bars  | 3                                             |
| Steam with a pressure of 15 bars | 4                                             |
| Heating with oil                 | 4                                             |
| Pyrolysis using gas              | 6                                             |

The global energy and water requirements of a production unit correspond to the energy and water necessary for an average ingredient produced in this unit. This average ingredient corresponds to an average process duration and process type.

To calculate this average, it was assumed that each ingredient is produced in the same proportion as the other ingredients of the same production unit (they were selected to be representative).

Knowing the duration and the process type of each ingredient, an average of all durations and process types has been calculated, according to the below equation:

$$Average\ Process_{prod\ unit} = \frac{1}{n} * \sum_{i=1}^n (Process\ duration_{ing\ i} * EC_{ing\ i})$$

With:

$\sum_{i=1}^n (Process\ duration_{ing\ i} * EC_{ing\ i})$ : the arithmetic mean of process duration and process type of all ingredients of a given production unit.

n: total number of ingredients in the same production unit

The estimation of the energy and water requirements for a specific ingredient is then calculated with a rule of three, thanks to the specific data of the ingredient and to the average process of the production unit, with the following equation:

$$Energy\ and\ Water\ Requirements_{ing\ x} = \frac{Process\ duration_{ing\ x} * EC_{ing\ x}}{Average\ Process_{prod\ unit}} * Energy\ and\ Water\ requirements_{prod\ unit}$$

with  $Process\ duration_{ing}$ : the duration of the process of the ingredient,  
 $EC_{ing}$ : the equivalence coefficient for the ingredient,  
 $Ing_i$ : all the ingredients produced in the same production unit as ingredient x,  
 $Energy\ and\ Water\ Requirements_{prod\ unit}$ : electricity, gaz and water needs of the production unit  
per kg of produced ingredient or per kg of starting raw material.

As for ingredients not manufactured by MANE but by suppliers, they were calculated by extrapolation with the corresponding MANE production unit and adapted, when possible, to the country of production.

### 3 Environmental results of fragrance ingredients

List of abbreviation:

- Climate change (CC)
- Water consumption (WC)
- Ecotoxicity, freshwater (EC)
- Eutrophication, freshwater (EF)
- Eutrophication, marine (EM)
- Acidification (A)
- Land use (LU)
- Eutrophication, terrestrial (ET)
- Mineral, fossil & ren resource depletion (RD)
- Particulate matter (PM)
- Ionising radiation (IR)
- Photochemical ozone formation (POF)
- Ozone depletion (OD)
- Human toxicity, cancer & non-cancer (HT)

Single scores (in mPt):

|       | Lavender EO | Elemi EO | Iris EO  | Vetiver EO | Pure Vanilla Jungle Essence™ | Pure Pink berry Jungle Essence™ | Orange essence | Orange flower absolute | Jasmine absolute |
|-------|-------------|----------|----------|------------|------------------------------|---------------------------------|----------------|------------------------|------------------|
| Total | 2,03E+01    | 1,48E+00 | 4,55E+01 | 3,75E+00   | 1,43E+01                     | 6,76E+00                        | 6,04E-01       | 2,08E+02               | 2,71E+02         |
| CC    | 1,68E+00    | 2,40E-01 | 8,47E+00 | 5,45E-02   | 1,63E+00                     | 2,41E+00                        | 1,03E-01       | 6,89E+01               | 5,49E+01         |
| WC    | 3,01E-03    | 6,89E-04 | 1,88E-02 | 3,95E-04   | 5,52E-04                     | 9,44E-03                        | 1,20E-02       | 1,20E+00               | 4,51E-01         |
| EC    | 2,10E+00    | 8,44E-01 | 2,72E+00 | 2,50E-02   | 1,19E-01                     | 1,84E+00                        | 2,61E-01       | 2,47E+01               | 3,13E+01         |
| EF    | 5,95E-01    | 3,09E-02 | 6,50E-01 | 5,80E-03   | 1,96E+00                     | 6,31E-01                        | 5,48E-02       | 8,30E+00               | 1,01E+01         |
| EM    | 1,75E-01    | 8,30E-03 | 1,90E-01 | 2,65E-03   | 1,71E+00                     | 5,53E-02                        | 2,70E-02       | 1,43E+00               | 2,21E+00         |
| A     | 2,99E-01    | 9,07E-03 | 1,77E-01 | 2,98E-03   | 9,26E-03                     | 8,06E-02                        | 2,04E-02       | 2,00E+00               | 4,04E+00         |
| LU    | 5,20E+00    | 3,22E-02 | 2,98E+01 | 3,60E+00   | 6,83E+00                     | 4,89E-02                        | 1,07E-01       | 3,22E+01               | 2,49E+01         |
| ET    | 2,32E-01    | 4,98E-03 | 1,10E-01 | 1,80E-03   | 5,57E-03                     | 4,52E-02                        | 1,54E-02       | 1,34E+00               | 2,95E+00         |
| RD    | 6,41E-01    | 4,37E-02 | 1,28E+00 | 9,55E-03   | 1,95E+00                     | 7,67E-01                        | 4,77E-02       | 1,13E+01               | 1,24E+01         |
| PM    | 1,15E-07    | 1,86E-09 | 6,78E-08 | 1,10E-08   | 3,34E-09                     | 2,18E-08                        | 8,05E-09       | 6,59E-07               | 1,49E-06         |
| IR    | 2,91E-04    | 1,42E-04 | 7,68E-03 | 9,97E-06   | 1,38E-04                     | 1,62E-03                        | 1,22E-05       | 6,49E-02               | 4,40E-02         |
| POF   | 1,54E-01    | 1,02E-02 | 2,90E-01 | 3,88E-03   | 1,41E-02                     | 6,97E-02                        | 5,78E-03       | 2,77E+01               | 5,09E+01         |
| OZ    | 1,01E-03    | 1,41E-04 | 6,66E-03 | 4,63E-05   | 1,40E-04                     | 1,28E-03                        | 3,47E-05       | 5,81E-02               | 4,96E-02         |
| HT    | 9,24E+00    | 2,58E-01 | 1,80E+00 | 4,33E-02   | 7,53E-02                     | 8,05E-01                        | -5,10E-02      | 2,85E+01               | 7,66E+01         |

|       | Narcissus absolute | Rose absolute | Benzoin resinoid | Labdanum resinoid | Labdanum absolute | Vanilla absolute | cis-3-Hexenol (natural) | Iso E super | Vetiveryle acetate |
|-------|--------------------|---------------|------------------|-------------------|-------------------|------------------|-------------------------|-------------|--------------------|
| Total | 2,09E+02           | 1,84E+02      | 3,18E-01         | 1,07E+01          | 2,27E+01          | 1,13E+02         | 5,30E+01                | 1,91E+00    | 9,14E+00           |
| CC    | 8,72E+01           | 3,32E+01      | 6,80E-02         | 7,57E-01          | 3,17E+00          | 1,23E+01         | 8,04E+00                | 3,48E-01    | 4,54E-01           |
| WC    | 2,98E-01           | 3,88E-01      | 3,79E-04         | 1,75E-02          | 4,17E-02          | 3,18E-03         | 3,51E-01                | 1,09E-02    | 1,06E-02           |
| EC    | 2,61E+01           | 1,93E+01      | 8,74E-02         | 6,42E-01          | 2,31E+00          | 4,35E-01         | 5,19E+00                | 7,48E-01    | 7,61E-01           |
| EF    | 6,20E+00           | 7,75E+00      | 1,65E-02         | 3,45E-01          | 1,80E+00          | 1,56E+01         | 5,31E+00                | 1,06E-01    | 1,39E-01           |
| EM    | 1,36E+00           | 1,51E+00      | 2,81E-03         | 1,64E-01          | 2,09E-01          | 1,36E+01         | 3,32E+00                | 9,27E-03    | 1,33E-02           |
| A     | 2,03E+00           | 3,37E+00      | 2,84E-03         | 8,80E-02          | 1,91E-01          | 4,93E-02         | 2,18E+00                | 1,26E-02    | 1,83E-02           |
| LU    | 1,41E+00           | 2,39E+01      | 4,58E-03         | 5,98E-01          | 6,37E-01          | 5,47E+01         | 1,14E+01                | 2,02E-01    | 7,22E+00           |
| ET    | 1,32E+00           | 2,47E+00      | 1,45E-03         | 5,70E-02          | 9,20E-02          | 2,95E-02         | 1,71E+00                | 5,45E-03    | 8,51E-03           |
| RD    | 1,28E+01           | 8,09E+00      | 2,34E-02         | 2,33E-01          | 7,15E-01          | 1,54E+01         | 1,81E+00                | 1,24E-01    | 1,48E-01           |
| PM    | 6,45E-07           | 1,31E-06      | 9,16E-10         | 3,84E-08          | 1,16E-07          | 2,28E-08         | 1,14E-06                | 1,54E-08    | 2,82E-08           |
| IR    | 8,69E-02           | 2,69E-02      | 4,16E-05         | 1,81E-04          | 3,27E-04          | 4,20E-04         | 7,34E-04                | 5,34E-05    | 3,60E-04           |
| POF   | 5,34E+01           | 5,28E+01      | 8,73E-02         | 8,99E+00          | 1,37E+01          | 4,81E-01         | 4,44E-01                | 2,64E-02    | 3,43E-02           |
| OZ    | 7,80E-02           | 3,41E-02      | 4,06E-05         | 2,67E-04          | 8,20E-04          | 5,11E-04         | 2,59E-03                | 1,41E-04    | 2,84E-04           |
| HT    | 1,67E+01           | 3,08E+01      | 2,33E-02         | -1,19E+00         | -1,08E-01         | 3,59E-01         | 1,33E+01                | 3,17E-01    | 3,30E-01           |

|       | Myrcene (from crude sulfate turpentine) | Myrcene (from pine) | Hexyl salicylate | Ethyl 2-methyl butyrate | Hedione  | cis-3-Hexenol (fossil-based) | Antillone | γ-Octalactone | Tropicalone |
|-------|-----------------------------------------|---------------------|------------------|-------------------------|----------|------------------------------|-----------|---------------|-------------|
| Total | 5,94E-01                                | 2,92E-01            | 1,15E+00         | 5,01E-01                | 9,17E+00 | 6,36E-01                     | 4,72E+01  | 3,58E+00      | 7,27E+01    |
| CC    | 5,69E-02                                | 3,94E-02            | 2,93E-01         | 1,17E-01                | 3,30E+00 | 2,67E-01                     | 3,32E+00  | 5,11E-01      | 4,92E+00    |
| WC    | 2,79E-03                                | 1,40E-04            | 3,53E-03         | 1,50E-03                | 1,66E-02 | 7,20E-04                     | 2,12E-02  | 2,14E-02      | 2,88E-02    |
| EC    | 1,21E-01                                | 1,45E-01            | 3,62E-01         | 1,99E-01                | 2,77E+00 | 1,47E-01                     | 7,07E+00  | 1,60E+00      | 1,02E+01    |
| EF    | 2,61E-02                                | 1,46E-02            | 1,44E-01         | 4,23E-02                | 8,02E-01 | 6,20E-02                     | 1,21E+00  | 1,73E-01      | 1,84E+00    |
| EM    | 3,07E-03                                | 8,26E-04            | 6,76E-03         | 3,66E-03                | 3,11E-01 | 5,56E-03                     | 8,11E-01  | 7,05E-02      | 1,21E+00    |
| A     | 3,08E-03                                | 9,79E-04            | 1,36E-02         | 4,83E-03                | 7,25E-02 | 8,03E-03                     | 4,28E-01  | 2,57E-02      | 6,69E-01    |
| LU    | 2,78E-01                                | 1,68E-03            | 5,94E-03         | 6,06E-03                | 5,66E-02 | 4,06E-03                     | 3,71E+00  | 2,68E-01      | 5,54E+00    |
| ET    | 1,94E-03                                | 4,94E-04            | 4,21E-03         | 2,52E-03                | 2,72E-02 | 3,58E-03                     | 3,30E-01  | 1,76E-02      | 5,16E-01    |
| RD    | 4,09E-02                                | 4,28E-02            | 1,31E-01         | 4,44E-02                | 6,63E-01 | 5,46E-02                     | 2,55E+00  | 3,04E-01      | 3,93E+00    |
| PM    | 4,95E-09                                | 4,48E-10            | 6,49E-09         | 2,35E-09                | 4,65E-08 | 4,49E-09                     | 1,65E-07  | 1,49E-08      | 2,59E-07    |
| IR    | 2,18E-05                                | 2,25E-05            | 5,20E-05         | 8,54E-05                | 2,36E-04 | 1,44E-05                     | 4,87E-04  | 2,01E-04      | 7,19E-04    |
| POF   | 4,10E-03                                | 1,06E-03            | 1,14E-02         | 6,27E-03                | 8,79E-02 | 1,16E-02                     | 2,21E-01  | 3,29E-02      | 3,60E-01    |
| OZ    | 3,84E-05                                | 2,34E-05            | 1,13E-04         | 5,33E-05                | 1,06E-03 | 7,28E-05                     | 1,12E-03  | 1,64E-04      | 1,67E-03    |
| HT    | 5,65E-02                                | 4,45E-02            | 1,74E-01         | 7,26E-02                | 1,07E+00 | 7,22E-02                     | 2,75E+01  | 5,61E-01      | 4,35E+01    |

### Characterisation:

|                                 |           |                                               |              |
|---------------------------------|-----------|-----------------------------------------------|--------------|
| Climate change (CC)             | kg CO2 eq | Eutrophication, terrestrial (WTE)             | mol N eq     |
| Water consumption (WC)          | m3        | Mineral, fossil & ren resource depletion (RD) | kg Sb eq     |
| Ecotoxicity, freshwater (EC)    | CTUe      | Particulate matter (PM)                       | disease inc. |
| Eutrophication, freshwater (EF) | kg P eq   | Ionising radiation (IR)                       | kBq U-235 eq |
| Eutrophication, marine (EM)     | kg N eq   | Photochemical ozone formation (POF)           | kg NMVOC eq  |
| Acidification (A)               | mol H+ eq | Ozone depletion (OD)                          | kg CFC11 eq  |
| Land use (LU)                   | Pt        | Human toxicity, cancer & non-cancer (HT)      | CTUh         |

|     | Lavender EO | Elemi EO | Iris EO  | Vetiver EO | Pure Vanilla Jungle Essence™ | Pure Pink berry Jungle Essence™ | Orange essence | Orange flower absolute | Jasmine absolute |
|-----|-------------|----------|----------|------------|------------------------------|---------------------------------|----------------|------------------------|------------------|
| CC  | 5,35E+01    | 7,63E+00 | 2,69E+02 | 1,73E+00   | 5,19E+01                     | 7,64E+01                        | 6,04E-01       | 2,19E+03               | 1,74E+03         |
| WC  | 1,22E-01    | 2,79E-02 | 7,59E-01 | 1,60E-02   | 2,23E-02                     | 3,82E-01                        | 1,03E-01       | 4,86E+01               | 1,83E+01         |
| EC  | 8,15E+02    | 3,29E+02 | 1,06E+03 | 9,72E+00   | 4,64E+01                     | 7,15E+02                        | 1,20E-02       | 9,63E+03               | 1,22E+04         |
| EF  | 1,09E-02    | 5,65E-04 | 1,19E-02 | 1,06E-04   | 3,58E-02                     | 1,16E-02                        | 2,61E-01       | 1,52E-01               | 1,84E-01         |
| EM  | 2,28E-01    | 1,08E-02 | 2,48E-01 | 3,45E-03   | 2,23E+00                     | 7,20E-02                        | 5,48E-02       | 1,87E+00               | 2,88E+00         |
| A   | 1,15E+00    | 3,48E-02 | 6,79E-01 | 1,14E-02   | 3,55E-02                     | 3,09E-01                        | 2,70E-02       | 7,66E+00               | 1,55E+01         |
| LU  | 1,68E+04    | 1,04E+02 | 9,61E+04 | 1,16E+04   | 2,20E+04                     | 1,58E+02                        | 2,04E-02       | 1,04E+05               | 8,01E+04         |
| ET  | 4,95E+00    | 1,06E-01 | 2,34E+00 | 3,83E-02   | 1,19E-01                     | 9,63E-01                        | 1,07E-01       | 2,86E+01               | 6,29E+01         |
| RD  | 1,11E-03    | 7,59E-05 | 2,22E-03 | 1,66E-05   | 3,39E-03                     | 1,33E-03                        | 1,54E-02       | 1,96E-02               | 2,15E-02         |
| PM  | 7,41E-06    | 1,20E-07 | 4,37E-06 | 7,12E-07   | 2,15E-07                     | 1,41E-06                        | 4,77E-02       | 4,25E-05               | 9,57E-05         |
| IR  | 3,05E+00    | 1,49E+00 | 8,04E+01 | 1,04E-01   | 1,44E+00                     | 1,70E+01                        | 8,05E-09       | 6,79E+02               | 4,60E+02         |
| POF | 4,27E-01    | 2,83E-02 | 8,03E-01 | 1,07E-02   | 3,89E-02                     | 1,93E-01                        | 1,22E-05       | 7,65E+01               | 1,41E+02         |
| OZ  | 7,20E-06    | 1,00E-06 | 4,73E-05 | 3,29E-07   | 9,92E-07                     | 9,07E-06                        | 5,78E-03       | 4,12E-04               | 3,52E-04         |
| HT  | 1,71E-04    | 4,78E-06 | 3,33E-05 | 8,01E-07   | 1,39E-06                     | 1,49E-05                        | 3,47E-05       | 5,29E-04               | 1,42E-03         |

|     | Narcissus absolute | Rose absolute | Benzoin resinoid | Labdanum resinoid | Labdanum absolute | Vanilla absolute | cis-3-Hexenol (natural) | Iso E super | Vetiveryle acetate |
|-----|--------------------|---------------|------------------|-------------------|-------------------|------------------|-------------------------|-------------|--------------------|
| CC  | 2,77E+03           | 1,05E+03      | 2,16E+00         | 2,40E+01          | 1,01E+02          | 3,92E+02         | 5,30E+01                | 1,11E+01    | 1,44E+01           |
| WC  | 1,21E+01           | 1,57E+01      | 1,53E-02         | 7,07E-01          | 1,69E+00          | 1,28E-01         | 8,04E+00                | 4,41E-01    | 4,28E-01           |
| EC  | 1,01E+04           | 7,52E+03      | 3,40E+01         | 2,50E+02          | 8,97E+02          | 1,69E+02         | 3,51E-01                | 2,91E+02    | 2,96E+02           |
| EF  | 1,14E-01           | 1,42E-01      | 3,02E-04         | 6,31E-03          | 3,29E-02          | 2,86E-01         | 5,19E+00                | 1,94E-03    | 2,54E-03           |
| EM  | 1,77E+00           | 1,96E+00      | 3,66E-03         | 2,13E-01          | 2,72E-01          | 1,78E+01         | 5,31E+00                | 1,21E-02    | 1,73E-02           |
| A   | 7,79E+00           | 1,29E+01      | 1,09E-02         | 3,37E-01          | 7,33E-01          | 1,89E-01         | 3,32E+00                | 4,84E-02    | 7,02E-02           |
| LU  | 4,53E+03           | 7,69E+04      | 1,48E+01         | 1,93E+03          | 2,05E+03          | 1,76E+05         | 2,18E+00                | 6,52E+02    | 2,33E+04           |
| ET  | 2,82E+01           | 5,26E+01      | 3,09E-02         | 1,22E+00          | 1,96E+00          | 6,29E-01         | 1,14E+01                | 1,16E-01    | 1,81E-01           |
| RD  | 2,22E-02           | 1,40E-02      | 4,07E-05         | 4,03E-04          | 1,24E-03          | 2,67E-02         | 1,71E+00                | 2,15E-04    | 2,57E-04           |
| PM  | 4,15E-05           | 8,43E-05      | 5,90E-08         | 2,47E-06          | 7,46E-06          | 1,47E-06         | 1,81E+00                | 9,90E-07    | 1,82E-06           |
| IR  | 9,09E+02           | 2,81E+02      | 4,35E-01         | 1,89E+00          | 3,42E+00          | 4,39E+00         | 1,14E-06                | 5,59E-01    | 3,76E+00           |
| POF | 1,48E+02           | 1,46E+02      | 2,41E-01         | 2,49E+01          | 3,78E+01          | 1,33E+00         | 7,34E-04                | 7,30E-02    | 9,50E-02           |
| OZ  | 5,54E-04           | 2,42E-04      | 2,88E-07         | 1,90E-06          | 5,82E-06          | 3,63E-06         | 4,44E-01                | 1,00E-06    | 2,02E-06           |
| HT  | 3,09E-04           | 5,71E-04      | 4,31E-07         | -2,21E-05         | -1,99E-06         | 6,66E-06         | 2,59E-03                | 5,87E-06    | 6,11E-06           |

|     | Myrcene<br>(from<br>crude<br>sulfate<br>turpentine) | Myrcene<br>(from<br>pine) | Hexyl<br>salicylate | Ethyl 2-<br>methyl<br>butyrate | Hedione  | cis-3-<br>Hexenol<br>(fossil-<br>based) | Antillone | $\gamma$ -<br>Octalactone | Tropicalone |
|-----|-----------------------------------------------------|---------------------------|---------------------|--------------------------------|----------|-----------------------------------------|-----------|---------------------------|-------------|
| CC  | 1,81E+00                                            | 1,25E+00                  | 9,29E+00            | 3,73E+00                       | 1,05E+02 | 8,48E+00                                | 1,05E+02  | 1,62E+01                  | 1,56E+02    |
| WC  | 1,13E-01                                            | 5,68E-03                  | 1,43E-01            | 6,06E-02                       | 6,71E-01 | 2,91E-02                                | 8,56E-01  | 8,66E-01                  | 1,17E+00    |
| EC  | 4,70E+01                                            | 5,65E+01                  | 1,41E+02            | 7,75E+01                       | 1,08E+03 | 5,71E+01                                | 2,75E+03  | 6,23E+02                  | 3,95E+03    |
| EF  | 4,78E-04                                            | 2,68E-04                  | 2,63E-03            | 7,75E-04                       | 1,47E-02 | 1,14E-03                                | 2,21E-02  | 3,16E-03                  | 3,36E-02    |
| EM  | 4,00E-03                                            | 1,08E-03                  | 8,81E-03            | 4,77E-03                       | 4,05E-01 | 7,25E-03                                | 1,06E+00  | 9,19E-02                  | 1,57E+00    |
| A   | 1,18E-02                                            | 3,75E-03                  | 5,21E-02            | 1,85E-02                       | 2,78E-01 | 3,08E-02                                | 1,64E+00  | 9,87E-02                  | 2,56E+00    |
| LU  | 8,97E+02                                            | 5,42E+00                  | 1,91E+01            | 1,95E+01                       | 1,82E+02 | 1,31E+01                                | 1,20E+04  | 8,64E+02                  | 1,78E+04    |
| ET  | 4,14E-02                                            | 1,05E-02                  | 8,99E-02            | 5,37E-02                       | 5,80E-01 | 7,64E-02                                | 7,04E+00  | 3,75E-01                  | 1,10E+01    |
| RD  | 7,10E-05                                            | 7,43E-05                  | 2,26E-04            | 7,70E-05                       | 1,15E-03 | 9,47E-05                                | 4,42E-03  | 5,27E-04                  | 6,82E-03    |
| PM  | 3,19E-07                                            | 2,88E-08                  | 4,18E-07            | 1,51E-07                       | 3,00E-06 | 2,89E-07                                | 1,07E-05  | 9,62E-07                  | 1,67E-05    |
| IR  | 2,28E-01                                            | 2,36E-01                  | 5,44E-01            | 8,94E-01                       | 2,47E+00 | 1,50E-01                                | 5,10E+00  | 2,11E+00                  | 7,52E+00    |
| POF | 1,13E-02                                            | 2,92E-03                  | 3,15E-02            | 1,73E-02                       | 2,43E-01 | 3,22E-02                                | 6,11E-01  | 9,11E-02                  | 9,97E-01    |
| OZ  | 2,73E-07                                            | 1,66E-07                  | 8,04E-07            | 3,79E-07                       | 7,49E-06 | 5,17E-07                                | 7,97E-06  | 1,17E-06                  | 1,19E-05    |
| HT  | 1,05E-06                                            | 8,25E-07                  | 3,21E-06            | 1,34E-06                       | 1,97E-05 | 1,34E-06                                | 5,09E-04  | 1,04E-05                  | 8,06E-04    |
